# Supplementary material
Source: publisher site journal article supplement (https://www.spandidos-publications.com/4857/downloadSupplementary)
Supplement: Supplementary file 1 [file downloadSupplementary]

## Sheet: BXPC-3-YY1_peak-gene
Table SI. ChIP-Seq results suggest that YY1 can directly bind to the promoter region of RGS22.
chr	peak start	peak end	gene id	symbol
BXPC-3-YY1 ChIP-Seq peak gene
chr8	100973881	100974025	26166	RGS22
BXPC-3-YY1 ChIP-Seq motif
>chr8:100973882-100974025:19.15
GACTAATACAGTTGTCATAAGGATCAAAATGTGAGCAGGAGTGTCAGCAAATGTTAGGGAGACTATGAGGCTGGCCTGAGGGGTGGAGAAATGGGCAAAAGAGTATAGAGGCTAGGGTAAACTAGAAGAGAAAAAAATGAGTGG
